# Supplementary material for: Interplay between hydrogen bonding and metal coordination in alkali metal tartrates and hydrogen tartrates
Source: Royal Society of Chemistry journal article supplement (doi:10.1039/c4ce00291a), 2014-01-01
Supplement: c4ce00291a1.pdf [file c4ce00291a1.pdf]

## Supporting Information

### **Interplay between hydrogen bonding and metal coordination in alkali metal tartrates and hydrogen tartrates**

Thomas Gelbrich,<sup>\*a</sup> Terence L. Threlfall<sup>b</sup> and Michael B. Hursthouse<sup>b,c</sup>

<sup>a</sup> *Institute of Pharmacy, University of Innsbruck, Innrain 52, 6020 Innsbruck, Austria.*

<sup>b</sup> *School of Chemistry, University of Southampton, Highfield, Southampton, UK SO17 1BJ, UK.*

<sup>c</sup> *Department of Chemistry, Faculty of Science, King Abdulaziz University, Jeddah, 21588, Saudi Arabia.*

thomas.gelbrich@uibk.ac.at

## Contents

|        |                                                                      |    |
|--------|----------------------------------------------------------------------|----|
| 1.     | Analysis of structure similarity relationships.....                  | 3  |
| 1.1.   | General.....                                                         | 3  |
| 1.2.   | Supramolecular constructs.....                                       | 3  |
| 1.2.1. | Connectivity motif <b>I</b> : chain type A- <i>syn</i> .....         | 3  |
| 1.2.2. | Connectivity motif <b>I</b> : chain type A- <i>anti</i> .....        | 5  |
| 1.2.3. | Connectivity motif <b>II</b> .....                                   | 8  |
| 2.     | Crystal packing arrangement in the series <i>M</i> (D,L-HTart) ..... | 12 |
| 3.     | Crystallization experiments.....                                     | 13 |
| 4.     | References .....                                                     | 14 |

# 1. Analysis of structure similarity relationships

## 1.1. General

Crystal packing comparisons were carried out using version 2.0 of the program *XPac*<sup>1</sup> and quantitative dissimilarity parameters were generated in the previously described manner.<sup>2</sup> All comparisons were based on geometrical parameters generated from all C and O atoms of the anion, whereas metal centres and water molecules were not included in these calculations.

## 1.2. Supramolecular constructs

### 1.2.1. Connectivity motif I: chain type A-syn

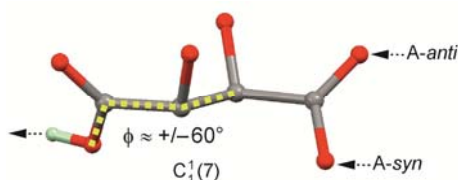

**Figure S1.** Definition of the geometries A-syn and A-anti chains of (carbonyl)O–H...O=C(carboxylate) bonded HTart<sup>−</sup> ions.

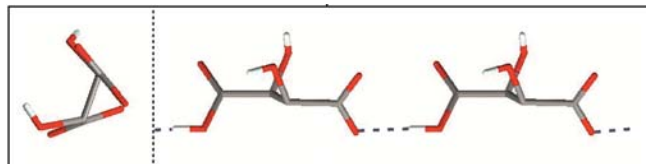

**Figure S2.** Chain type A-syn.

**Table S1.** Lattice vectors (*t*) associated with the chain type A-syn.

| Structure | CSD     | Ref. | <i>t</i>      | Length (Å) |
|-----------|---------|------|---------------|------------|
| <b>1a</b> | .       | .    | 010           | 7.065      |
| <b>1b</b> | DULSIN  | 3    | 0 $\bar{1}$ 0 | 7.146      |
| <b>15</b> | ZZZSS01 | 4    | 100           | 7.242      |

**Table S2.** *XPac* dissimilarity parameters *x* for pairwise structure comparisons involving a cluster of three anions which represents the A-syn chain.

| Structure 1 | Structure 2 | <i>x</i> | Notes    |
|-------------|-------------|----------|----------|
| <b>1a</b>   | <b>1b</b>   | 2.2      | <i>a</i> |
| <b>1a</b>   | <b>15</b>   | 5.2      | .        |
| <b>1b</b>   | <b>15</b>   | 5.8      | <i>b</i> |

*a* = The structures **1a** and **2b** have a double-stranded chain of H-bonded HTart<sup>−</sup> ions in common, whose two strands are A-syn chains (see Figure S3 and Figure 2c).

*b* = The structures **1b** and **15** have a layer in common which is composed of A-syn chains related by 2<sub>1</sub> symmetry (see Figure S4).

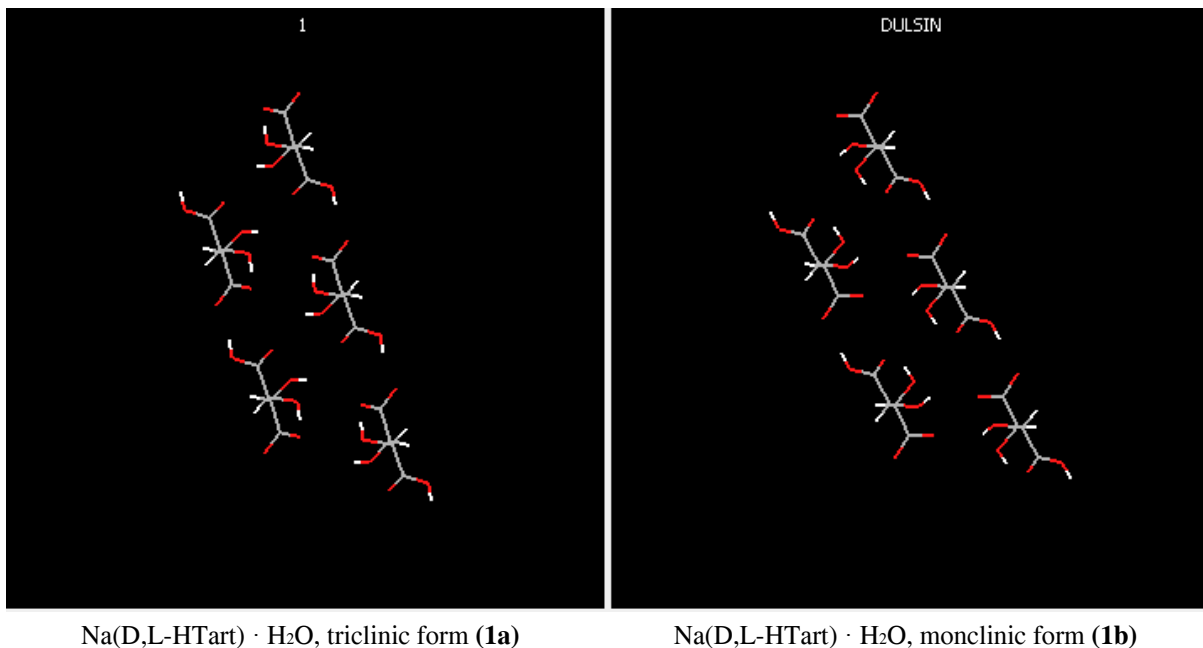

Na(D,L-HTart) · H<sub>2</sub>O, triclinic form (**1a**)

Na(D,L-HTart) · H<sub>2</sub>O, monoclinic form (**1b**)

**Figure S3.** Common 1D SC (supramolecular construct)<sup>1</sup> of structures **1a** and **1b**: double-stranded chain of H-bonded HTart<sup>-</sup> ions, whose two strands are A-*syn* chains ( $x = 2.2$  for the cluster of five HTart<sup>-</sup> ions representing this SC).

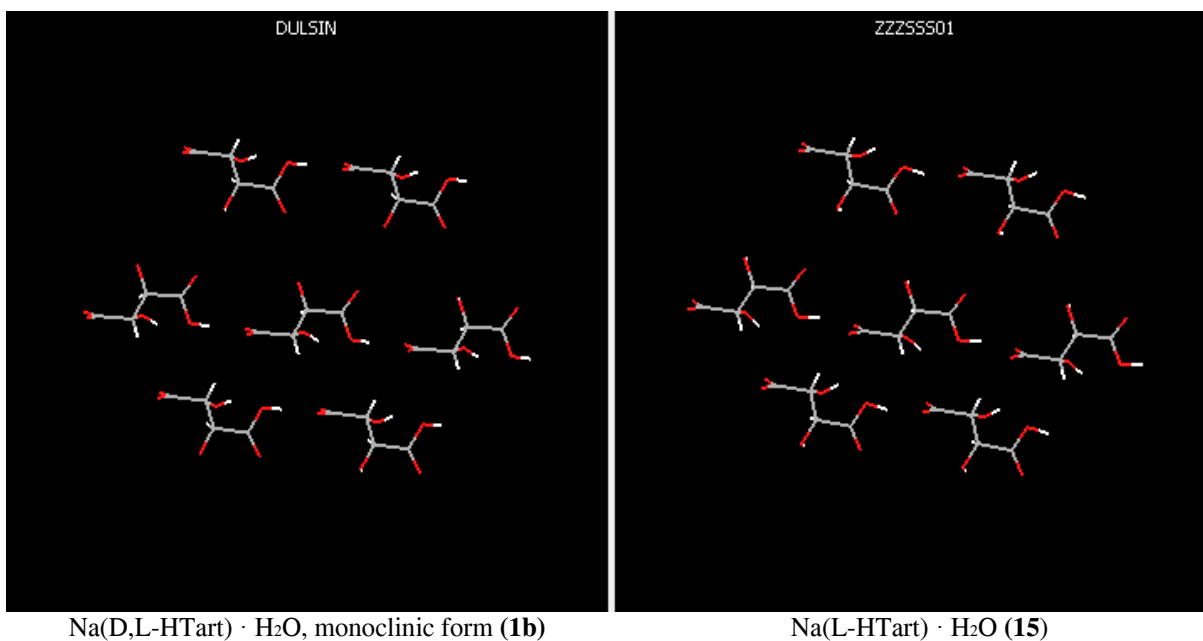

Na(D,L-HTart) · H<sub>2</sub>O, monoclinic form (**1b**)

Na(L-HTart) · H<sub>2</sub>O (**15**)

**Figure S4.** Common 2D SC of structures **1b** and **15**: layer of H-bonded HTart<sup>-</sup> ions composed of A-*syn* chains ( $x = 8.1$  for the cluster of seven HTart<sup>-</sup> ions representing this SC). Corresponding lattice parameters: **1b**: 010 / 7.146 Å, 101 / 10.887 Å, 90°; **15**:  $\bar{1}00$  / 7.242 Å, 001 / 10.592, 90°.

### 1.2.2. Connectivity motif I: chain type A-anti

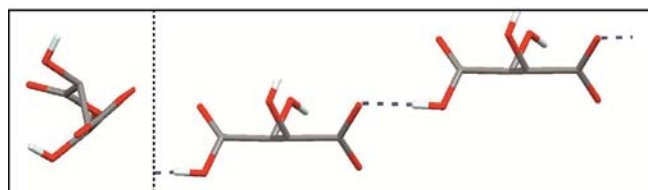

Figure S5. Chain type A-anti.

**Table S3.** Lattice vectors ( $t$ ) associated with the chain type A-anti.

| Structure | CSD      | Ref. | $t$         | Length (Å) |
|-----------|----------|------|-------------|------------|
| <b>2b</b> | XAHZIQ   | 5    | 100         | 7.683      |
| <b>5</b>  | XAHZAI   | 5    | 100         | 7.579      |
| <b>6</b>  | XAHZEM   | 5    | 100         | 7.626      |
| <b>13</b> | YEKYIW   | 6    | $\bar{1}00$ | 7.615      |
| <b>14</b> | YELNIM   | 7    | $00\bar{1}$ | 7.594      |
| <b>16</b> | ZZZRZW01 | 8    | 001         | 7.604      |
| <b>17</b> | KAMBIJ   | 9    | 001         | 7.653      |
| <b>18</b> | CSHTAR10 | 10   | 001         | 7.692      |

**Table S4.** *XPac* dissimilarity parameters  $x$  for pairwise structure comparisons involving a cluster of three anions which represents the A-*syn* chain. The dissimilarity parameters  $x'$  refer to larger structure fragments, either the complete substructure of HTart<sup>-</sup> ions (a) or to a layer of H-bonded HTart<sup>-</sup> ions (b) represented by six anions (see Figure S6).

| Structure 1 | Structure 2 | $x$  | $x'$               |
|-------------|-------------|------|--------------------|
| <b>13</b>   | <b>14</b>   | 9.8  | .                  |
| <b>13</b>   | <b>16</b>   | 3.3  | .                  |
| <b>13</b>   | <b>17</b>   | 3.5  | .                  |
| <b>13</b>   | <b>18</b>   | 4.2  | .                  |
| <b>13</b>   | <b>5</b>    | 3.4  | .                  |
| <b>13</b>   | <b>6</b>    | 3.6  | .                  |
| <b>13</b>   | <b>2b</b>   | 4.3  | .                  |
| <b>14</b>   | <b>16</b>   | 9.4  | .                  |
| <b>14</b>   | <b>17</b>   | 9.8  | .                  |
| <b>14</b>   | <b>18</b>   | 10.9 | .                  |
| <b>14</b>   | <b>5</b>    | 9.9  | .                  |
| <b>14</b>   | <b>6</b>    | 10.5 | .                  |
| <b>14</b>   | <b>2b</b>   | 11.0 | .                  |
| <b>16</b>   | <b>17</b>   | 1.2  | 1.6 <sup>(a)</sup> |
| <b>16</b>   | <b>18</b>   | 2.7  | 3.7 <sup>(a)</sup> |
| <b>16</b>   | <b>5</b>    | 2.4  | 2.1 <sup>(b)</sup> |
| <b>16</b>   | <b>6</b>    | 1.8  | 2.1 <sup>(b)</sup> |
| <b>16</b>   | <b>2b</b>   | 2.5  | 3.6 <sup>(b)</sup> |
| <b>17</b>   | <b>18</b>   | 1.6  | 2.2 <sup>(a)</sup> |
| <b>17</b>   | <b>5</b>    | 3.0  | 1.7 <sup>(b)</sup> |
| <b>17</b>   | <b>6</b>    | 1.8  | 1.7 <sup>(b)</sup> |
| <b>17</b>   | <b>2b</b>   | 1.7  | 2.5 <sup>(b)</sup> |
| <b>18</b>   | <b>5</b>    | 4.1  | 4.1 <sup>(b)</sup> |
| <b>18</b>   | <b>6</b>    | 2.5  | 2.6 <sup>(b)</sup> |
| <b>18</b>   | <b>2b</b>   | 1.4  | 1.4 <sup>(b)</sup> |
| <b>5</b>    | <b>6</b>    | 1.7  | 1.8 <sup>(a)</sup> |
| <b>5</b>    | <b>2b</b>   | 3.5  | 3.9 <sup>(a)</sup> |
| <b>6</b>    | <b>2b</b>   | 1.8  | 2.3 <sup>(a)</sup> |

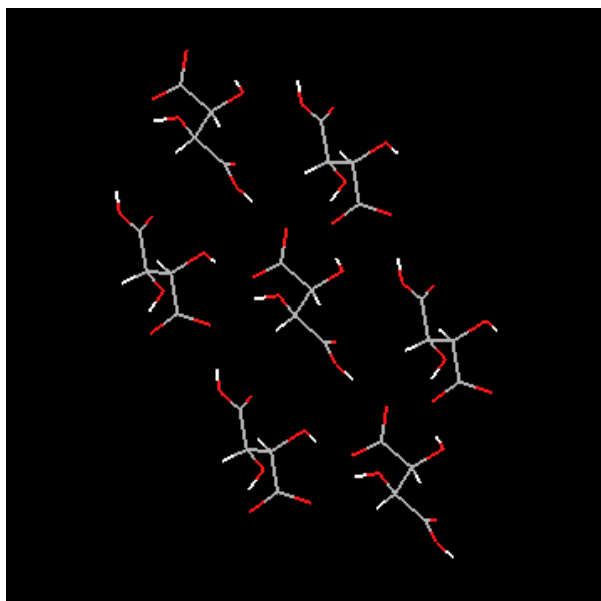

K(L-HTart) (**16**)

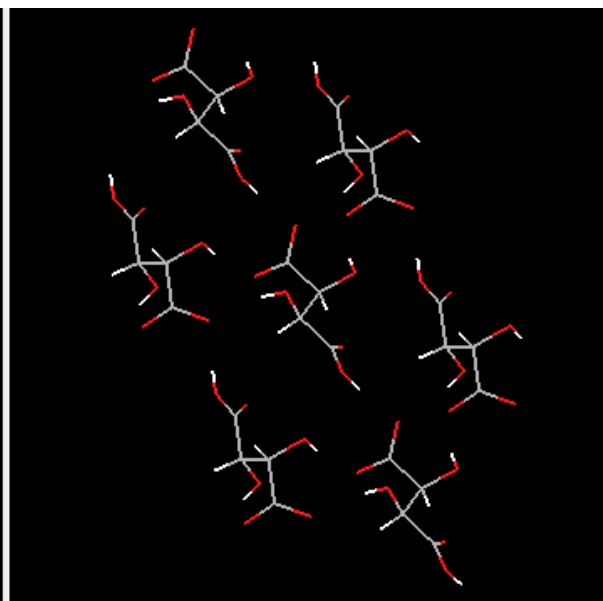

K(D,L-HTart) (**5**)

**Figure S6.** Common 2D SC present in the structures **2b**, **5**, **6** and **16 – 18**: layer of H-bonded HTart<sup>-</sup> ions containing A-syn chains.

### 1.2.3. Connectivity motif II

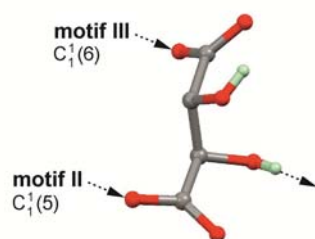

**Figure S7.** Definition of the connectivity motifs **II** and **III**.

**Table S5.** Lattice vectors ( $t$ ) associated with the translation of the chain motif **II** and the geometry subsets **IIa** and **IIb**.

| Structure  | CSD      | Ref. | $t$           | Length ( $\text{\AA}$ ) | Geometry   |
|------------|----------|------|---------------|-------------------------|------------|
| <b>2a</b>  | .        | .    | 100           | 5.065                   | <b>IIa</b> |
| <b>3</b>   | .        | .    | 100           | 5.073                   | <b>IIa</b> |
| <b>12</b>  | UNIROZ   | 11   | 100           | 5.064                   | <b>IIb</b> |
| <b>14</b>  | YELNIM   | 7    | 100           | 5.251                   | <b>IIb</b> |
| <b>19a</b> | UNIRUF   | 11   | 100           | 5.044                   | <b>IIb</b> |
| <b>19c</b> | .        | 12   | 010           | 5.014                   | .          |
| <b>20a</b> | UNISIU   | 11   | 010           | 5.019                   | <b>IIb</b> |
| <b>20b</b> | .        | 12   | 0 $\bar{1}$ 0 | 4.970                   | <b>IIb</b> |
| <b>23</b>  | NADTRT   | 13   | 001           | 4.959                   | <b>IIa</b> |
| <b>28</b>  | ZZZLZE01 | 14   | 0 $\bar{1}$ 0 | 5.014                   | .          |



**Table S6.** *XPac* dissimilarity parameters  $x$  for pairwise structure comparisons involving a cluster of three anions. This cluster represents the geometry of the H-bonded chain which is based on motif **II**. The dissimilarity parameters  $x'$  refer to the larger 2D structure fragments shown in Figure S8 and Figure 5 (a) or in Figure S9 (b).

| Structure 1                | Structure 2 | $x$           | $x'$               |
|----------------------------|-------------|---------------|--------------------|
| <b>Geometry subset IIa</b> |             |               |                    |
| <b>2a</b>                  | <b>3</b>    | 4.4           | 3.4 <sup>(a)</sup> |
| <b>2a</b>                  | <b>23</b>   | 3.1           | .                  |
| <b>3</b>                   | <b>23</b>   | 5.6           | .                  |
| <b>Geometry subset IIb</b> |             |               |                    |
| <b>12</b>                  | <b>14</b>   | 7.0           | 8.3 <sup>(b)</sup> |
| <b>12</b>                  | <b>19a</b>  | { 8.8<br>10.7 | .                  |
| <b>12</b>                  | <b>20a</b>  | 10.8          | .                  |
| <b>12</b>                  | <b>20b</b>  | 11.5          | .                  |
| <b>14</b>                  | <b>19a</b>  | { 4.7<br>6.2  | .                  |
| <b>14</b>                  | <b>20a</b>  | 6.1           | .                  |
| <b>14</b>                  | <b>20b</b>  | 9.3           | .                  |
| <b>19a</b>                 | <b>20a</b>  | { 1.9<br>5.1  | .                  |
| <b>19a</b>                 | <b>20b</b>  | { 5.8<br>10.9 | .                  |
| <b>20a</b>                 | <b>20b</b>  | 10.5          | .                  |

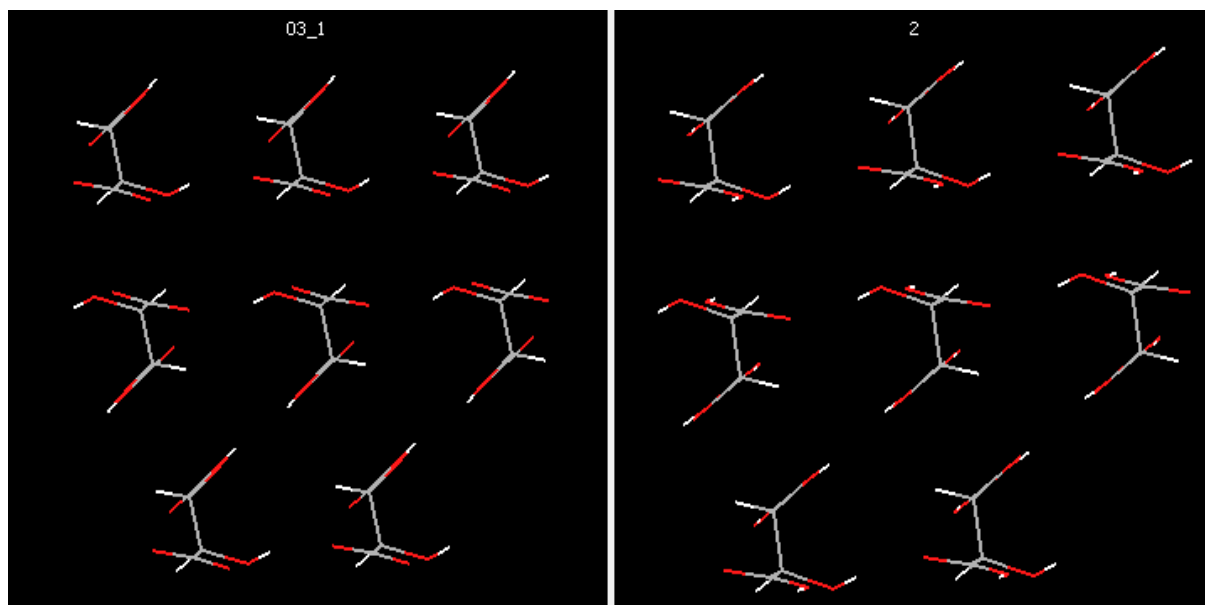

LiCs(D,L-Tart) · 2H<sub>2</sub>O (**3**)

Cs(D,L-HTart), triclinic form (**2a**)

**Figure S8.** Common 2D SC of structures **3** and **2a**: layer of H-bonded HTart<sup>-</sup> ions composed of chains of the **IIa** geometry type. Corresponding lattice parameters: **3**: 100 / 5.073 Å, 00 $\bar{1}$  / 10.509 Å, 81.2°; **2a**: 100 / 5.064 Å, 001 / 9.957 Å, 85.5°.

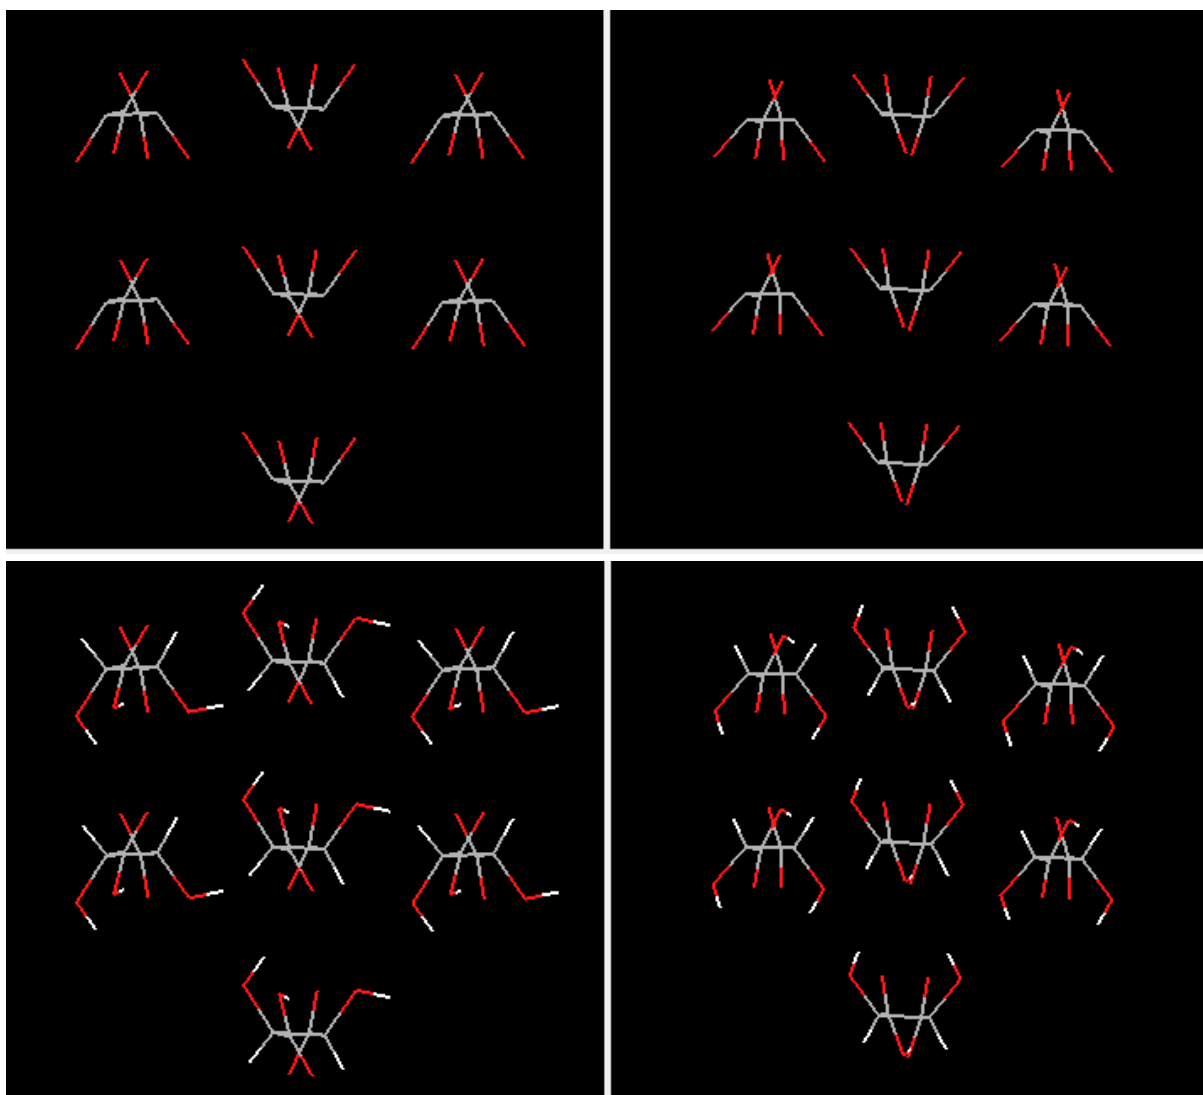

Li(L-HTart) (**12**)

Na(L-HTart) (**14**)

**Figure S9.** Common 2D SC of structures **12** and **14**: layer of H-bonded HTart<sup>-</sup> ions composed of chains of the **IIb** geometry type. Corresponding lattice parameters: **12**: 100 / 5.064 Å, 010 / 8.330 Å, 90°; **14**: 100 / 5.064 Å, 010 / 7.782 Å, 90°. The top and bottom diagrams show the same layer of anions without and with H atoms. Note the differences in the H positions between the two structures.

## 2. Crystal packing arrangement in the series $M(\text{D,L-HTart})$

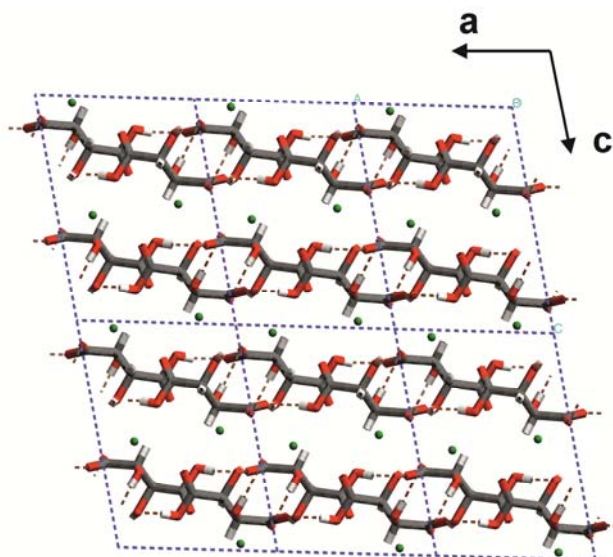

**Figure S10.** The packing of  $\text{HTart}^-$  (rods) and  $\text{M}^+$  (balls) ions in the crystal structure of the series  $M(\text{D,L-HTart})$  with  $M = \text{Cs}$  (**2b**),  $\text{K}$  (**5**) and  $\text{Rb}$  (**6**) (view along  $[010]$ ).<sup>5</sup> The  $\text{M}^+$  ions (green balls) are arranged between two layers which are composed exclusively of H-bonded  $\text{D-HTart}^-$  or  $\text{L-HTart}^-$  ions and which lie parallel to  $(110)$ .

### 3. Crystallisation experiments

**Table S7.** Overview of crystalline phases obtained from mixtures of 0.2 molar aqueous solutions of alkali metal or ammonium hydroxides (*MOH*) and D,L-tartaric acid (D,L-H<sub>2</sub>Tart) in the wells of a 96 well plate (crystallisation at room temperature). No. = number of crystallization experiment (multiple phases were identified for nos. 8, 9, 15, 16, 23, 27); Rat. = ratio *MOH* : D,L-H<sub>2</sub>Tart or ratio *MOH* : *M'*OH : D,L-H<sub>2</sub>Tart; *d* = number of days from the preparation of the mixture to the harvest of the crystal; SXR / UC: phase identification on the basis of SXR unit cell data; SXR / FS = phase identification on the basis of a full structure determination; # = label of the phase in Table 5.

| No. | <i>M</i>        | <i>M'</i>       | Rat.  | <i>d</i>     | SXR / UC | FS             | Phase                                                                    | #         | CSD refcode | Ref.             |
|-----|-----------------|-----------------|-------|--------------|----------|----------------|--------------------------------------------------------------------------|-----------|-------------|------------------|
| 1   | Li              | -               | 1:1   | 15           | +        | + <sup>c</sup> | Li(D,L-HTart) · H <sub>2</sub> O                                         | <b>13</b> | YEKYIW01    | 5                |
| 2   | Na              | -               | 1:1   | 7            | +        | + <sup>d</sup> | Na(D,L-HTart) · H <sub>2</sub> O <sup>e</sup>                            | <b>1a</b> | .           | <i>this work</i> |
| 3   | K               | -               | 1:1   | 7            | +        | + <sup>b</sup> | K(D,L-HTart)                                                             | <b>5</b>  | XAHZAI      | 5                |
| 4   | Rb              | -               | 1:1   | 7            | +        | + <sup>b</sup> | Rb(D,L-HTart)                                                            | <b>6</b>  | XAHZEM      | 5                |
| 5   | Cs              | -               | 1:1   | 7            | +        | + <sup>d</sup> | Cs(D,L-HTart) <sup>e</sup>                                               | <b>2a</b> | .           | <i>this work</i> |
| 6   | NH <sub>4</sub> | -               | 1:1   | 7            | +        | + <sup>b</sup> | NH <sub>4</sub> (D,L-HTart)                                              | .         | PUXKAU01    | 5                |
| 7   | Li              | -               | 2:1   | 20           | +        | + <sup>c</sup> | Li <sub>2</sub> (D,L-Tart) · 3H <sub>2</sub> O                           | <b>7</b>  | CEGPEK      | 15               |
| 8a  | Na              | -               | 2:1   | 30           | +        |                | Na <sub>2</sub> (D or L-Tart) · 2H <sub>2</sub> O                        | <b>23</b> | NADTRT      | 13               |
| 8b  | Na              | -               | 2:1   | 365          | +        | +              | Na <sub>2</sub> (D,L-Tart)                                               | <b>24</b> | COZGED      | 16               |
| 9a  | K               | -               | 2:1   | 20           | +        |                | K(D,L-HTart)                                                             | <b>5</b>  | XAHZAI      | 5                |
| 9b  | K               | -               | 2:1   | 365          | +        | +              | D,L-Tart · H <sub>2</sub> O                                              | .         | TARTDL01    | 17               |
| 10  | Rb              | -               | 2:1   | 30           | +        |                | Rb <sub>2</sub> (D or L-Tart)                                            | <b>29</b> | ZZZVZO02    | 18               |
| 11  | Cs              | -               | 2:1   | 15           | +        | +              | Cs <sub>2</sub> (D or L-Tart)                                            | <b>30</b> | SOFJOM      | 18               |
| 12  | NH <sub>4</sub> | -               | 2:1   | 20           | +        | +              | NH <sub>4</sub> (D,L-Tart)                                               | .         | ZZZJH01     | 19               |
| 13  | Li              | Na              | 1:1:1 | 365          | +        | + <sup>c</sup> | LiNa(D,L-Tart) · 2H <sub>2</sub> O                                       | <b>8</b>  | CEGPI0      | 15               |
| 14  | Li              | K               | 1:1:1 | 20           | +        | + <sup>c</sup> | LiK(D,L-Tart) · H <sub>2</sub> O                                         | <b>9</b>  | JEFVIA      | 15               |
| 15a | Li              | Rb              | 1:1:1 | 20           | +        | + <sup>c</sup> | LiRb(D,L-Tart) · H <sub>2</sub> O                                        | <b>10</b> | JEFVOG      | 15               |
| 15b | Li              | Rb              | 1:1:1 | 300          | +        | +              | Rb(D or L-HTart)                                                         | <b>17</b> | KAMBIJ      | 9                |
| 16a | Li              | Cs              | 1:1:1 | 20           | +        | + <sup>c</sup> | LiCs(D,L-Tart) · H <sub>2</sub> O                                        | <b>11</b> | CEGPOU      | 15               |
| 16b | Li              | Cs              | 1:1:1 | 20           | +        | + <sup>d</sup> | LiCs(D,L-Tart) · 2H <sub>2</sub> O                                       | <b>3</b>  | .           | <i>this work</i> |
| 17  | Li              | NH <sub>4</sub> | 1:1:1 | 20           | +        | + <sup>c</sup> | LiNH <sub>4</sub> (D,L-Tart) · H <sub>2</sub> O                          | .         | ZZZKDE01    | 15               |
| 18a | Na              | K               | 1:1:1 | 20           | +        |                | K(D,L-HTart)                                                             | <b>5</b>  | XAHZAI      | 5                |
| 18b | Na              | K               | 1:1:1 | 20           | +        |                | Na(D,L-HTart) · H <sub>2</sub> O                                         | <b>1a</b> | .           | <i>this work</i> |
| 19  | Na              | Rb              | 1:1:1 | <sup>a</sup> |          |                | .                                                                        | .         | .           | .                |
| 20  | Na              | Cs              | 1:1:1 | 15           | +        | +              | Na <sub>2</sub> CO <sub>3</sub> · H <sub>2</sub> O                       | .         | .           | 20               |
| 21  | Na              | NH <sub>4</sub> | 1:1:1 | 300          | +        | +              | Na <sub>2</sub> CO <sub>3</sub> · NaHCO <sub>3</sub> · 2H <sub>2</sub> O | .         | .           | 21               |
| 22  | K               | Rb              | 1:1:1 | 7            | +        | + <sup>b</sup> | K <sub>0.5</sub> Rb <sub>0.5</sub> (D,L-HTart)                           | .         | XAHZAI01    | 5                |
| 23b | K               | Cs              | 1:1:1 | 20           | +        |                | K(D,L-HTart)                                                             | <b>5</b>  | XAHZAI      | 5                |
| 23a | K               | Cs              | 1:1:1 | 20           | +        | +              | CsHCO <sub>3</sub>                                                       | .         | .           | 22               |
| 24  | K               | NH <sub>4</sub> | 1:1:1 | 7            | +        | + <sup>b</sup> | K <sub>0.56</sub> (NH <sub>4</sub> ) <sub>0.44</sub> (D,L-HTart)         | .         | XAHZAI02    | 5                |
| 25  | Rb              | Cs              | 1:1:1 | 20           | +        | + <sup>b</sup> | (Cs <sub>0.5</sub> Rb <sub>0.5</sub> ) <sub>2</sub> (D or L-Tart)        | <b>4</b>  | .           | <i>this work</i> |
| 26  | Rb              | NH <sub>4</sub> | 1:1:1 | 20           | +        | + <sup>b</sup> | Rb <sub>0.61</sub> (NH <sub>4</sub> ) <sub>0.39</sub> (D,L-HTart)        | .         | XAHZEM01    | 5                |
| 27a | Cs              | NH <sub>4</sub> | 1:1:1 | 20           | +        | + <sup>b</sup> | Cs(D,L-HTart) <sup>f</sup>                                               | <b>2b</b> | XAHZIQ      | 5                |
| 27b | Cs              | NH <sub>4</sub> | 1:1:1 | 20           | +        |                | NH <sub>4</sub> (D,L-HTart)                                              | .         | PUXKAU01    | 5                |

<sup>a</sup> No crystalline product was obtained.

<sup>b</sup> Crystal structure published in the first report.<sup>5</sup>

<sup>c</sup> Crystal structure published in the second report.<sup>15</sup>

<sup>d</sup> Crystal structure contained in this report.

<sup>e</sup> Triclinic polymorph.

<sup>f</sup> Monoclinic polymorph.

## 4. References

1. T. Gelbrich and M. B. Hursthouse, *CrystEngComm*, 2005, **7**, 324-336.
2. T. Gelbrich, T. L. Threlfall and M. B. Hursthouse, *CrystEngComm*, 2012, **14**, 5454-5464.
3. M. T. M. Al-Dajani, H. H. Abdallah, N. Mohamed, C. K. Quah and H.-K. Fun, *Acta Crystallogr., Sect. E.: Struct Rep. Online*, 2010, **66**, m138-m139.
4. R. C. Bott, D. S. Sagatys, D. E. Lynch, G. Smith and C. H. L. Kennard, *Acta Crystallogr., Sect. C: Cryst. Struct. Commun.*, 1993, **49**, 1150-1152.
5. T. Gelbrich, T. L. Threlfall, S. Huth, E. Seeger and M. B. Hursthouse, *Z. Anorg. Allg. Chem.*, 2004, **630**, 1451-1458.
6. R. C. Bott, D. S. Sagatys, G. Smith, K. A. Byriel and C. H. L. Kennard, *Polyhedron*, 1994, **13**, 3135-3141.
7. R. C. Bott, G. Smith, D. S. Sagatys, D. E. Lynch, A. N. Reddy and H. L. Kennard, *Z. Kristallogr.*, 1994, **209**, 803-807.
8. J. Buschmann and P. Luger, *Acta Crystallogr., Sect. C: Cryst. Struct. Commun.*, 1985, **41**, 206-208.
9. L. K. Templeton and D. H. Templeton, *Acta Crystallogr., Sect. C: Cryst. Struct. Commun.*, 1989, **45**, 675-676.
10. L. K. Templeton and D. H. Templeton, *Acta Crystallogr., Sect. A: Fundam. Crystallogr.*, 1978, **34**, 368-371.
11. H. H. M. Yeung, M. Kosa, M. Parrinello, P. M. Forster and A. K. Cheetham, *Cryst. Growth Des.*, 2011, **11**, 221-230.
12. H. H.-M. Yeung, M. Kosa, M. Parrinello and A. K. Cheetham, *Cryst. Growth Des.*, 2013, **13**, 3705-3715.
13. G. K. Ambady and G. Kartha, *Acta Crystallogr., Sect. B: Struct. Sci.*, 1968, **24**, 1540-1547.
14. R. Boese, D. Bläser, R. Latz and M. Piennisch, *Acta Crystallogr., Sect. C: Cryst. Struct. Commun.*, 1995, **51**, 2227-2229.
15. T. Gelbrich, T. L. Threlfall, S. Huth and E. Seeger, *Polyhedron*, 2006, **25**, 937-944.
16. W. Arbuckle, S. Cartner, A. R. Kennedy and C. A. Morrison, *Acta Crystallogr., Sect. E.: Struct Rep. Online*, 2009, **65**, m1232.
17. J.-J. Nie, D.-J. Xu, J.-Y. Wu and M. Y. Chiang, *Acta Crystallogr., Sect. E.: Struct Rep. Online*, 2001, **57**, o428-o429.
18. K. Stadnicka and Z. Brożek, *Acta Crystallogr., Sect. B: Struct. Sci.*, 1991, **47**, 484-492.
19. F. Miyaji, S. A. Davis, J. P. H. Charmant and S. Mann, *Chem. Mater.*, 1999, **11**, 3021-3024.
20. B. Dickens, F. A. Mauer and W. E. Brown, *J. Res. Nat. Bur. Stand., Sect. A*, 1970, **74**, 319-324.
21. C. S. Choi and A. D. Mighell, *Acta Crystallogr., Sect. B: Struct. Sci.*, 1982, **38**, 2874-2876.
22. Kaduk, *Z. Kristallogr.*, 1993, **205**, 219-220.
